# Supplementary material for: HCK induces macrophage activation to promote renal inflammation and fibrosis via suppression of autophagy
Source: PubMed Central journal article supplement (PMC10354075; doi:10.1038/s41467-023-40086-3), 2023-07-18
Supplement: 41467_2023_40086_MOESM1_ESM.pdf [file 41467_2023_40086_MOESM1_ESM.pdf]

**Supplementary Material for  
HCK induces macrophage activation to promote renal inflammation  
and fibrosis via suppression of autophagy**

This PDF file includes:

Supplementary Figures 1 to 5

Supplementary Table 1

**Supplementary Figure S1: HCK is highly enriched in macrophages and the expression level upregulated in diseased kidneys.**

**Supplementary Figure S2. HCK KO in BMDMs impacted cell spreading by integrin signaling.**

**Supplementary Figure S3. High dosage of dasatinib caused proteinuria in lupus mice.**

**Supplementary Figure S4. Chemical structures of 33 designed and synthesized compounds HCK inhibitors.**

**Supplementary Figure S5. Synthesis procedure of 3-(6,8-dichloro-2-phenyl-2H-chromen-3-yl)-5-phenyl-4,5-dihydro-1,2,4,5-oxadiazaborole (BT-424).**

**Supplementary Table S1. Serum chemistry test for mice treated with HCK selected inhibitor BT424 and vehicle.**

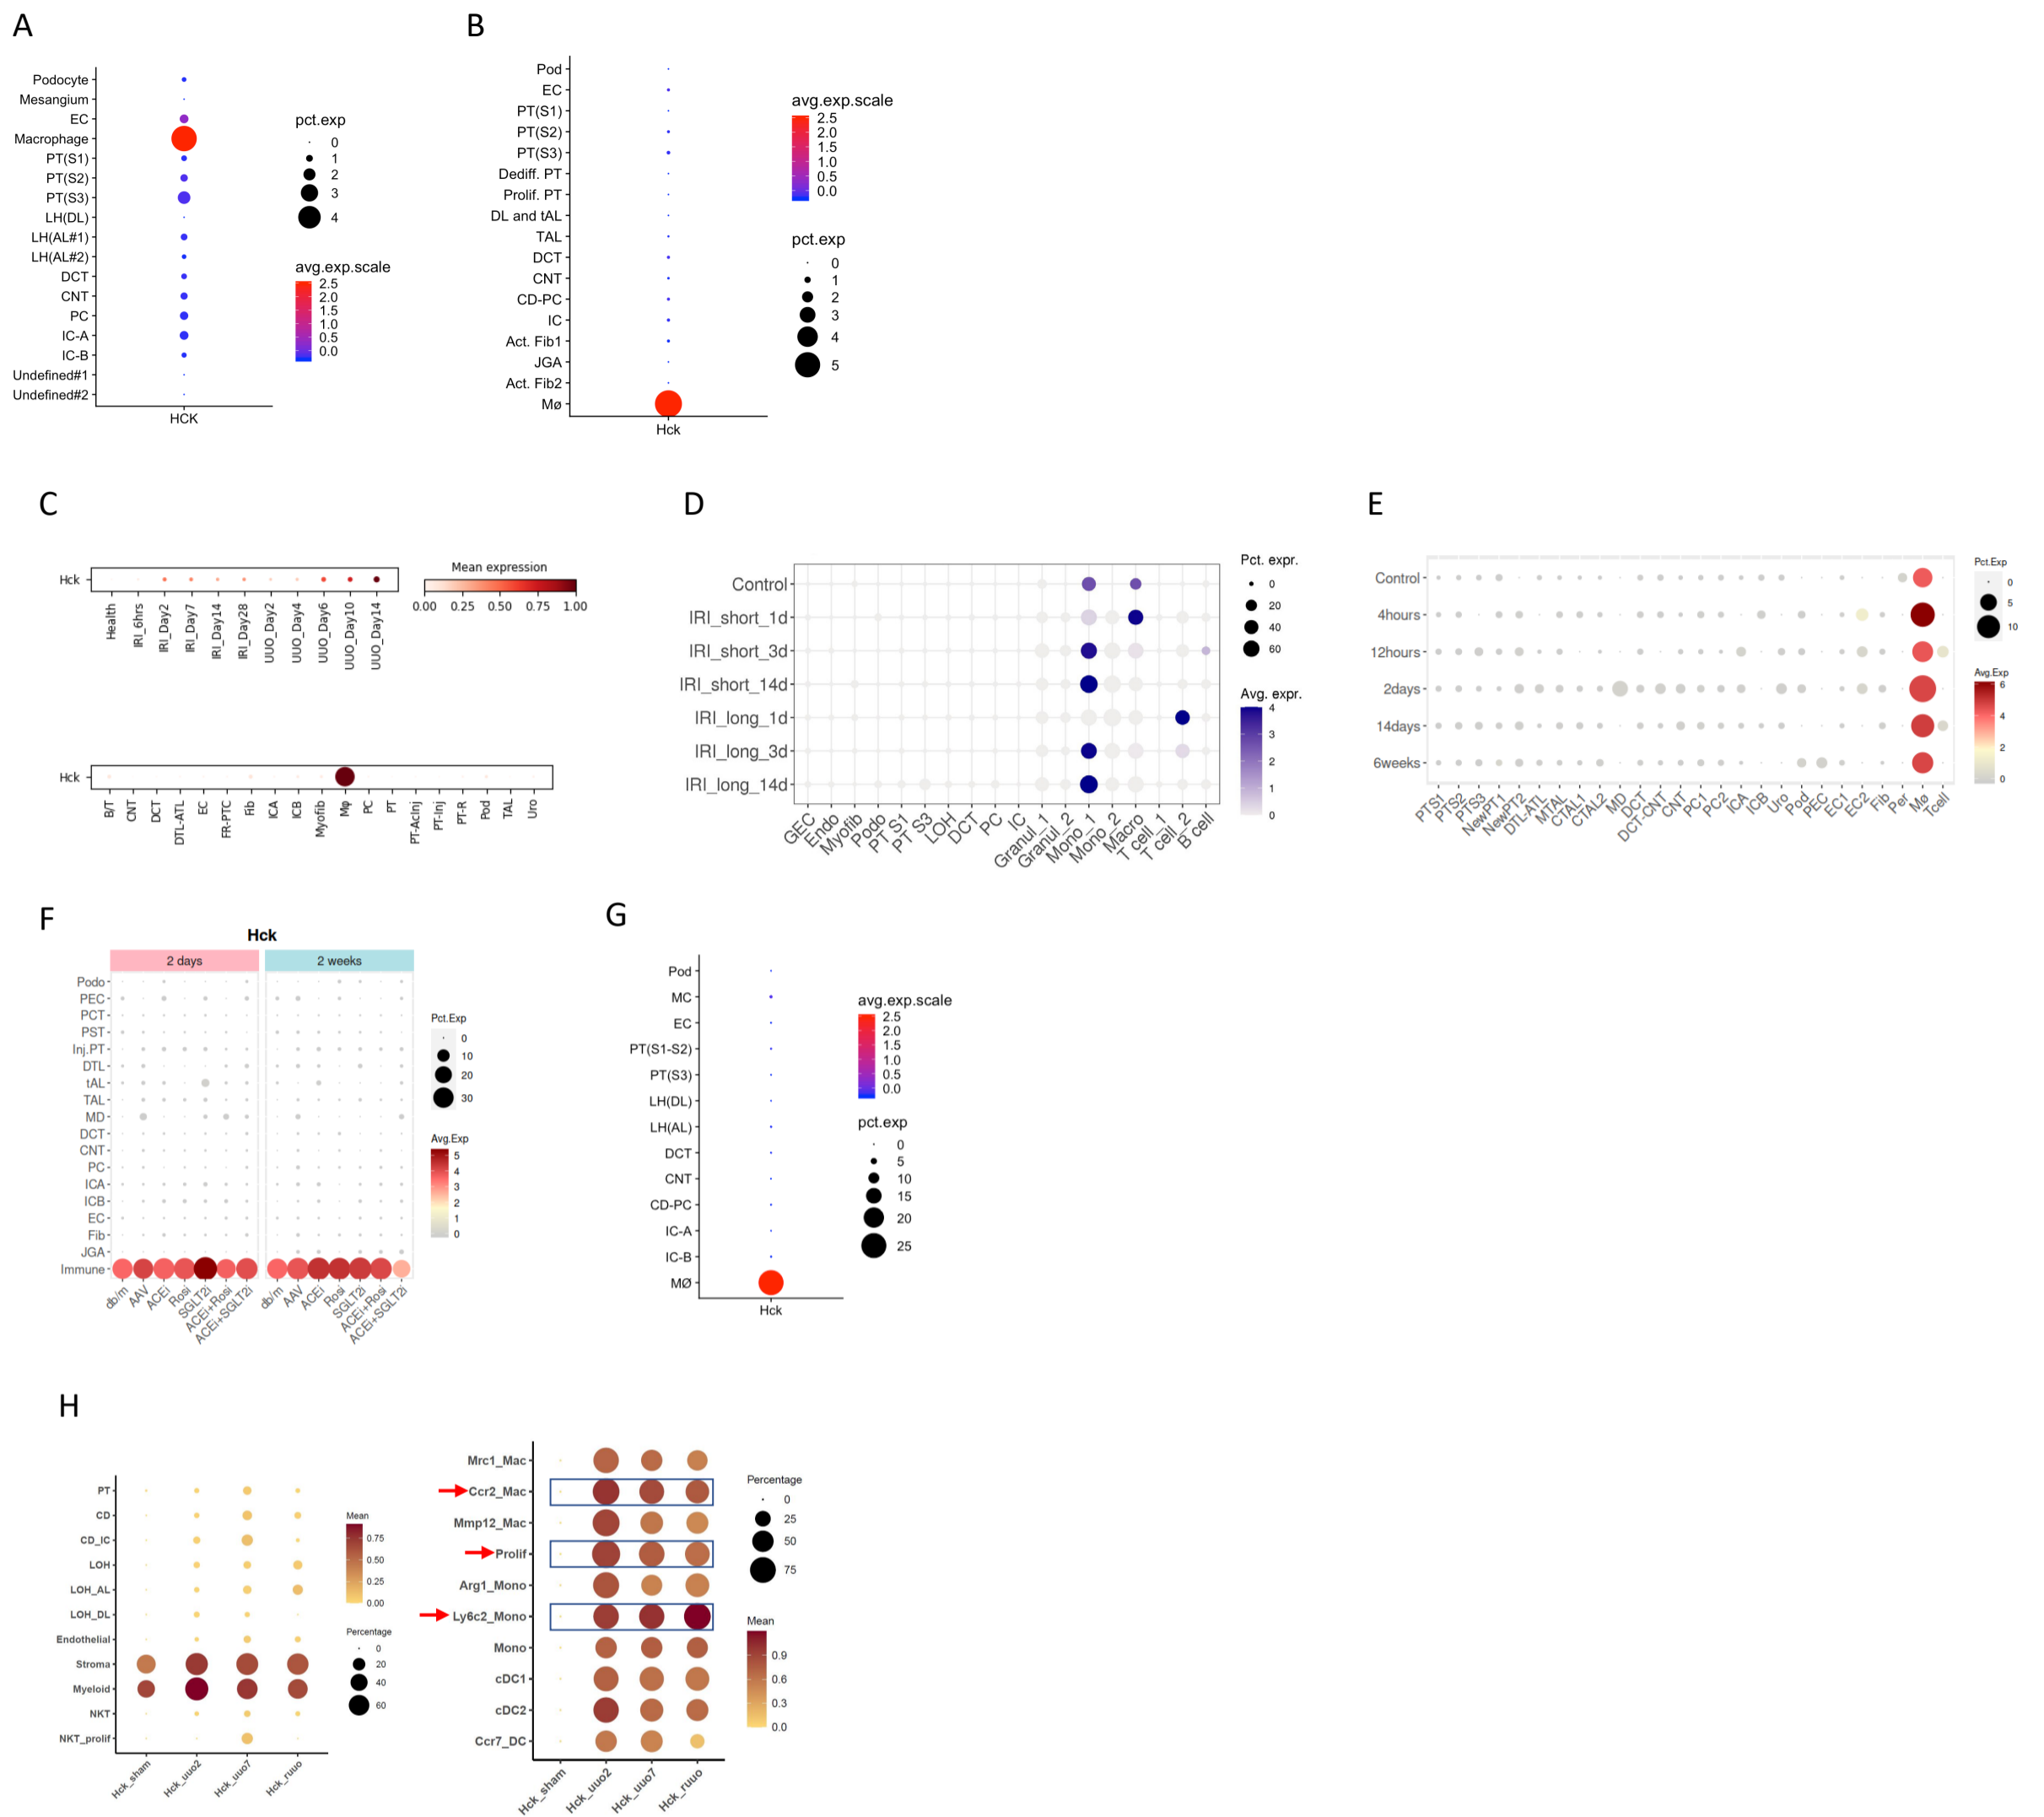

**Figure S1: HCK is highly enriched in macrophages and the expression level upregulated in diseased kidneys.**

**(A, B)** HCK is expressed in macrophages at low level in health kidneys. (A) Healthy Adult Kidney: Wu and Uchimura et al, Cell Stem Cell 2018. (B) Healthy Mouse Dataset: Wu et al, JASN 2019.

**(C-E)** HCK's expression level upregulated in diseased kidneys, comparing to health control kidneys. (C) Mouse IRI and UUO (Sham, IRI 6h 2d 7d 14d 28d, UUO 2d 7d 14d). Haikuo Li et al: In press. (D) Mouse IRI Kidney (short and long IRI, sham, 1d, 3d, 14d): Susztak et al, Nature Comm 2022. (E) Mouse IRI Kidney (Sham, 4hrs, 12hrs, 2days, 14days, and 6weeks): Kirita et al, PNAS 2020.

**(F, G)** HCK is expressed highly in macrophages in diseased kidneys. (F) 1 million cell atlas of mouse DKD and its treatments: Wu et al, Cell Metab 2022. (G) Mouse UUO (d14): Wu et al, JASN 2019. **(H)** HCK is mainly expressed in inflammatory (CCR2), infiltrating (Ly6) and proliferating (Mki67) macrophages subpopulation in diseased kidneys. (H) Mouse UUO (sham, 2d, 7d, R-UUO): Conway et al, JASN 2020.

EC, endothelial cells; PT, proximal tubular cells; LH, loop of Henle cells; DCT, distal convoluted cells; CNT, connecting tubular cells; PC, principal cells; IC-A, intercalate cells type A (located in the collection duct at the distal nephron); IC-B, intercalate cells type B (located in the collection duct at the distal nephron). Pod, podocyte; DL, descending loop; tAL, thin ascending loop; TAL, thick ascending loop; CD-PC, collecting duct – principal cell; IC, intercalated cell; Act. Fib., activated fibroblasts; JGA, juxtaglomerular apparatus; Mφ, macrophage.

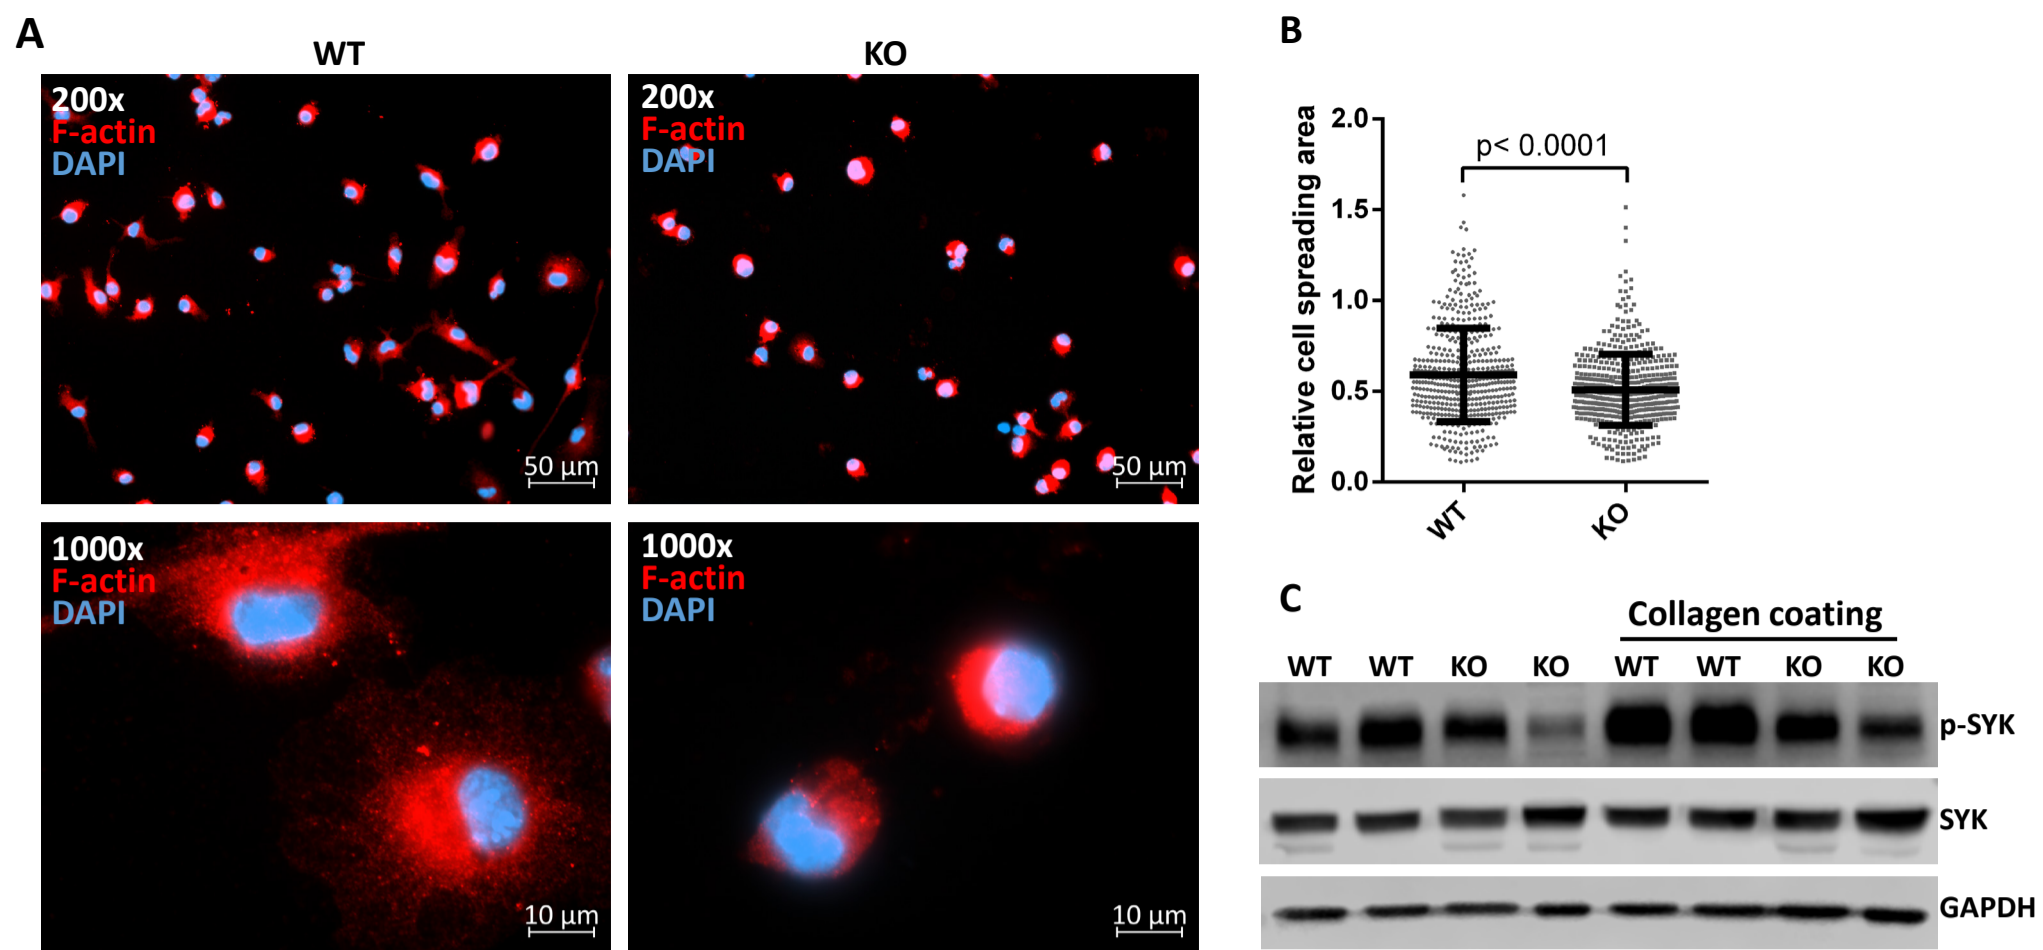

Figure S2. HCK KO in BMDMs impacted cell spreading by integrin signaling. Representative Immunofluorescence (IF) staining images (A) and quantification of cell spreading size (B) for F-actin in BMDM from WT and HCK KO mice. (C) Western blots for phospho-SYK show HCK KO decreased integrin signaling in BMDM.

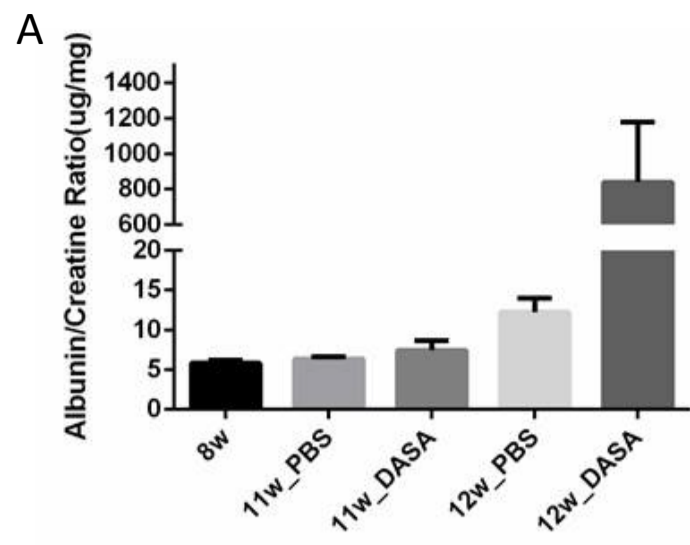

**Figure S3. High dosage of dasatinib caused proteinuria in lupus mice.** Urinary albumin-to-creatinine ratio was measured for lupus mice from 8 to 12 weeks with high dose of dasatinib treatment at 20mg/kg. DASA: dasatinib.

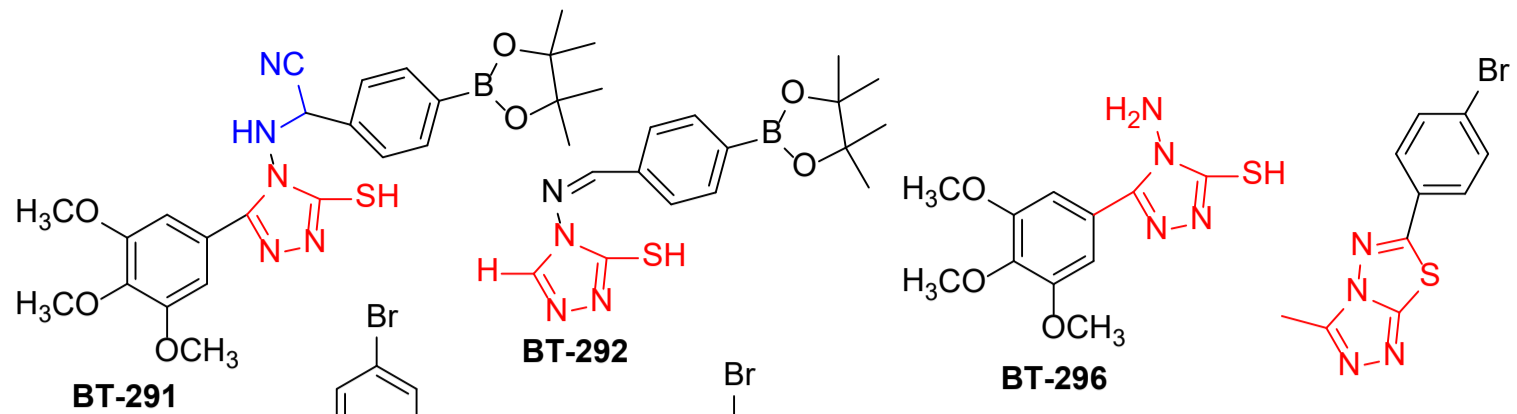

BT-291

BT-292

BT-296

BT-293

BT-291

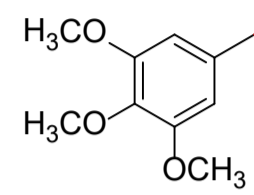

BT-294-Active

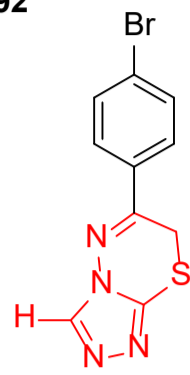

BT-295

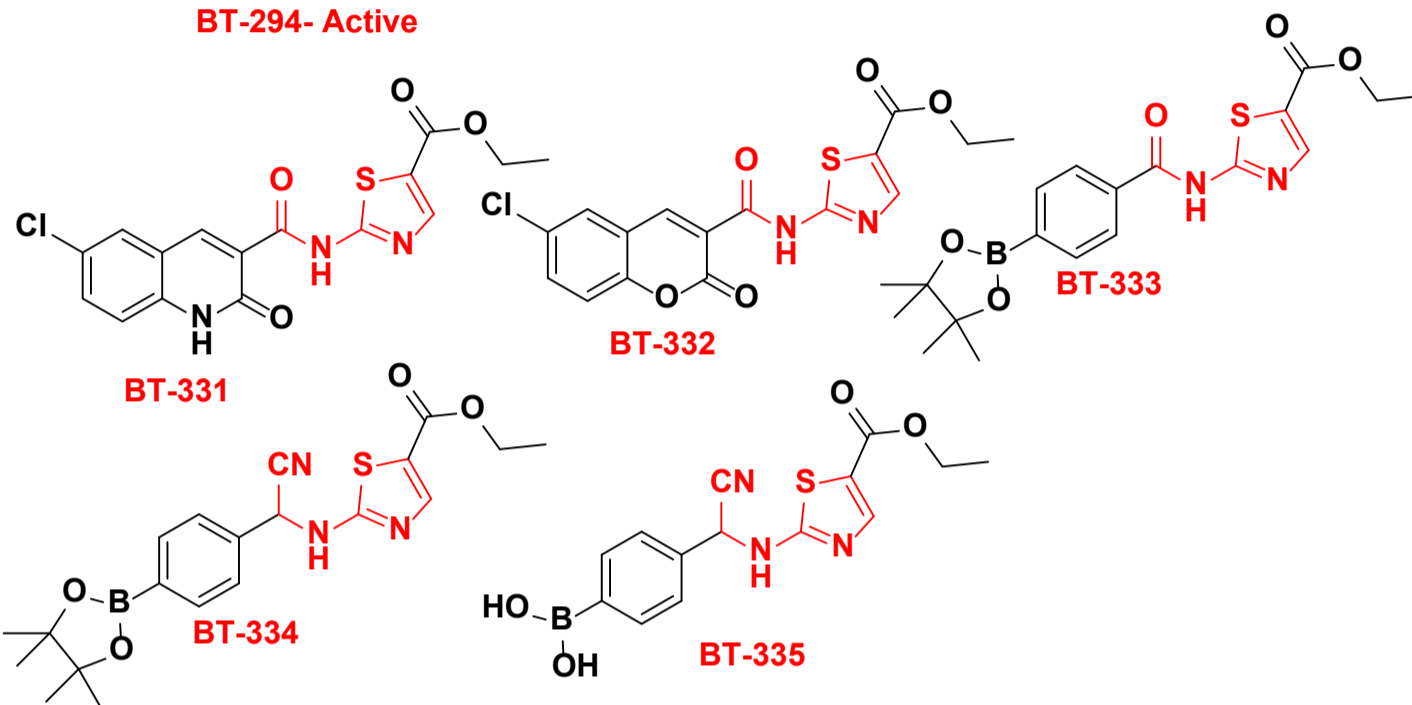

BT-331

BT-332

BT-333

BT-334

BT-335

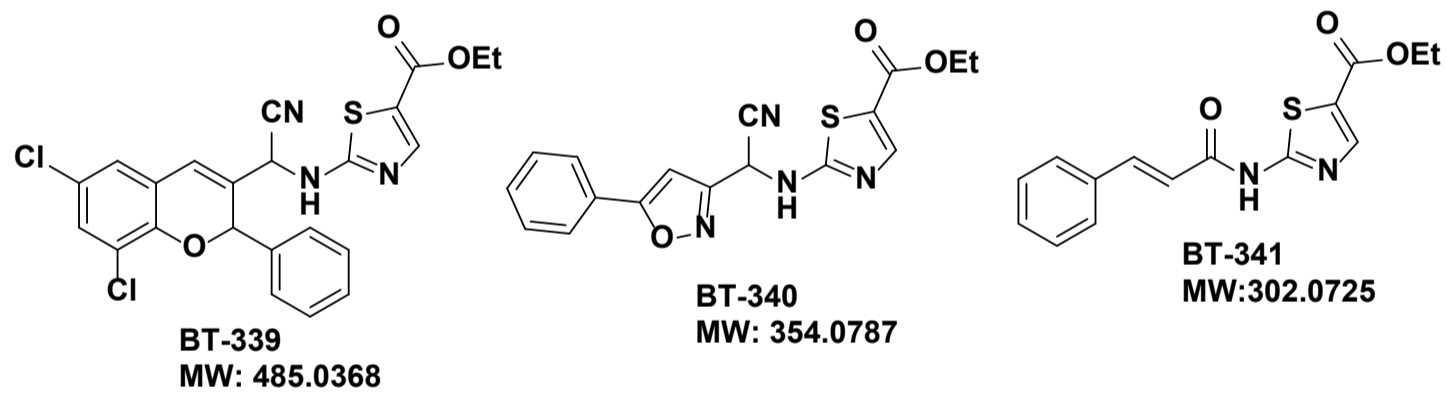

BT-339  
MW: 485.0368

BT-340  
MW: 354.0787

BT-341  
MW: 302.0725

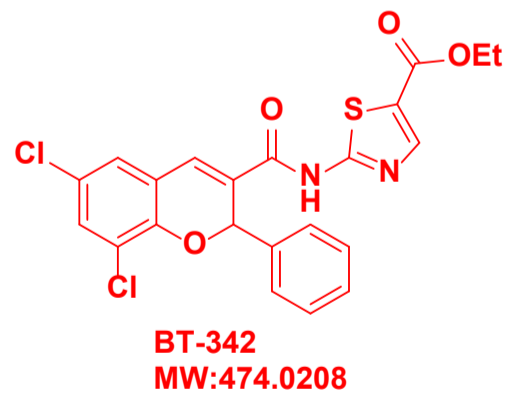

BT-342  
MW: 474.0208

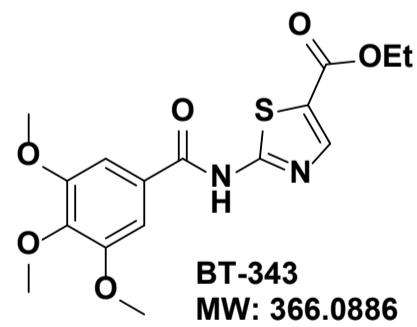

BT-343  
MW: 366.0886

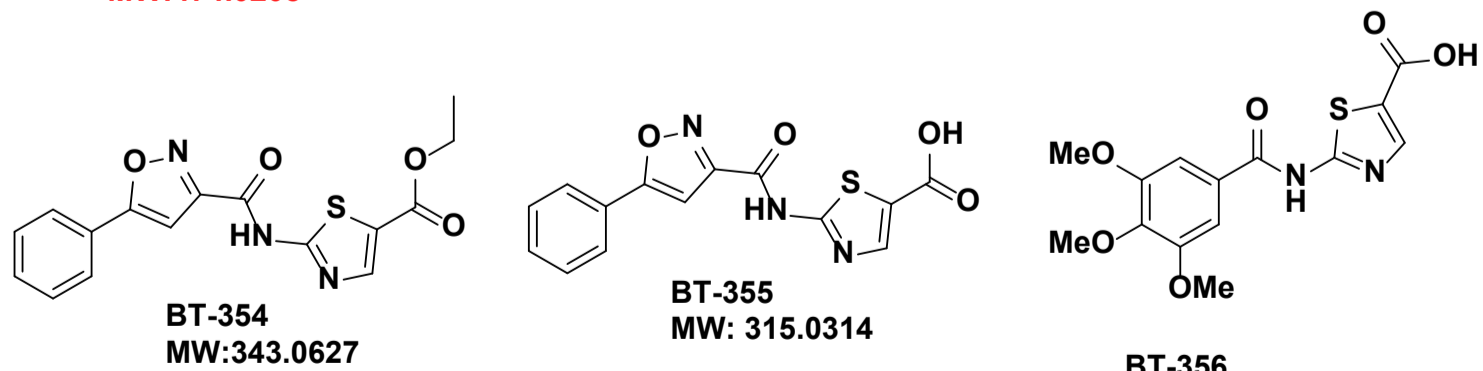

BT-354  
MW: 343.0627

BT-355  
MW: 315.0314

BT-356  
MW: 338.0573

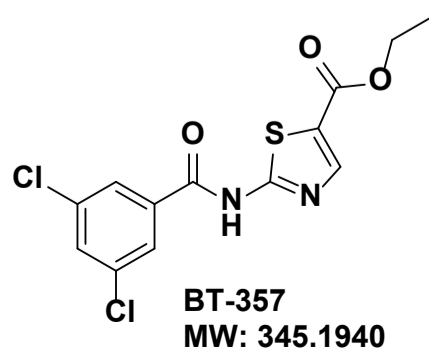

BT-357  
MW: 345.1940

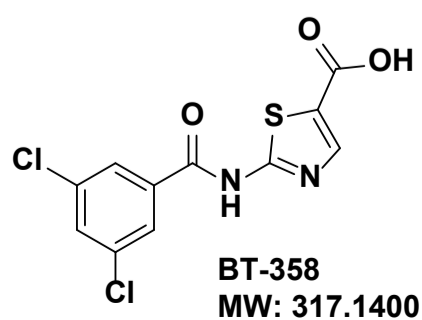

BT-358  
MW: 317.1400

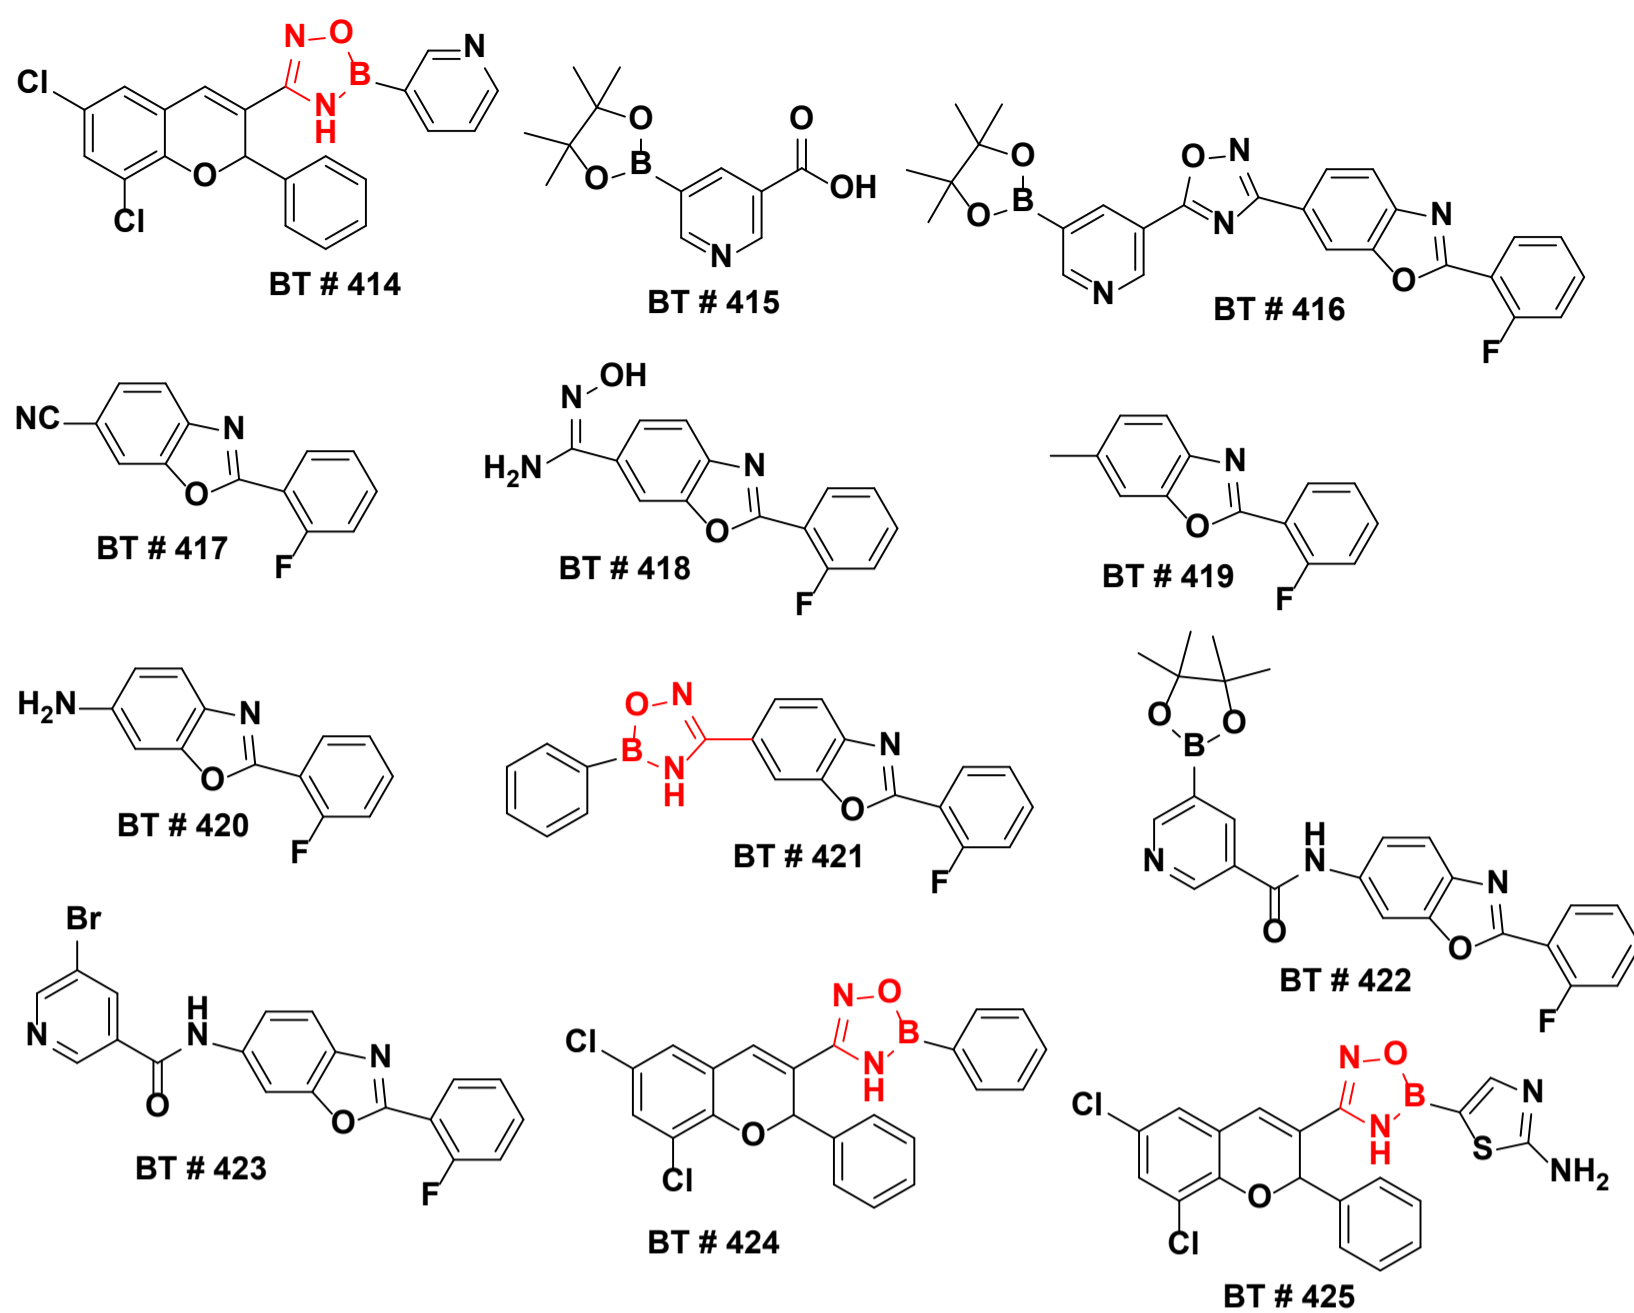

**Figure S4. Chemical structures of 33 designed and synthesized compounds HCK inhibitors.**

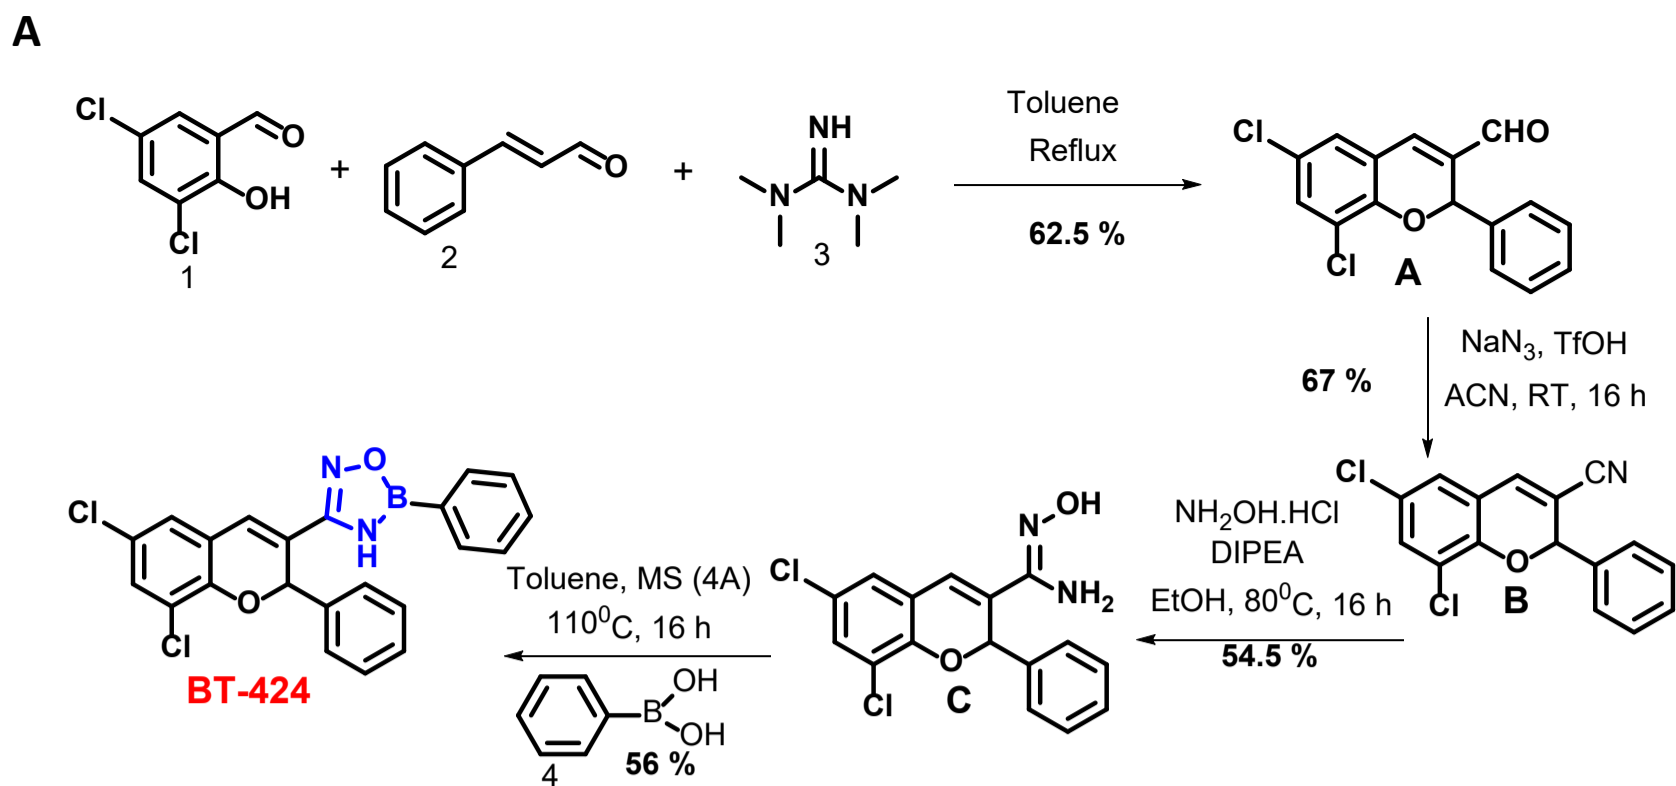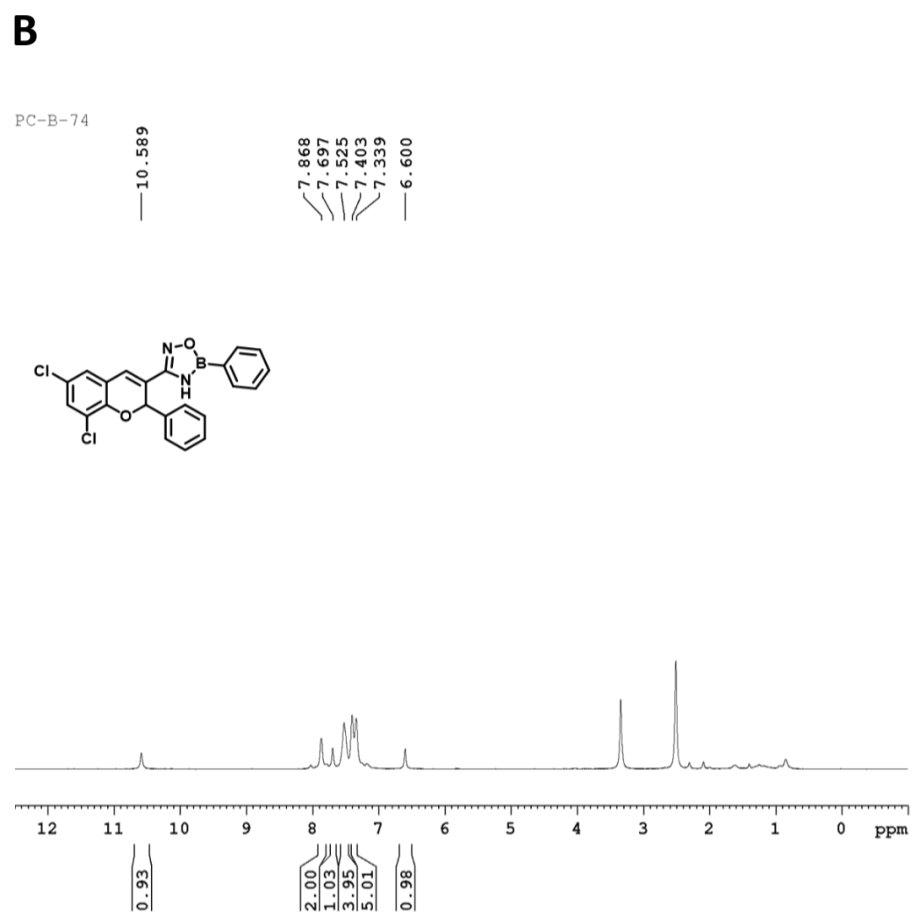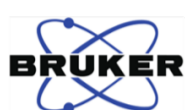

Current Data Parameters  
 NAME May10-2023  
 EXPNO 1  
 PROCNO 1

F2 - Acquisition Parameters  
 Date\_ 20230510  
 Time 10.49 h  
 INSTRUM Avance Neo 400 Nanobay  
 PROCNO 216379\_0311  
 FULPROG zg30  
 TD 65536  
 SOLVENT DMSO  
 NS 16  
 DS 2  
 SWH 8196.722 Hz  
 FIDRES 0.250144 Hz  
 AQ 3.9976959 sec  
 RG 101  
 DW 61.000 usec  
 DE 13.99 usec  
 TE 296.6 K  
 D1 1.0000000 sec  
 TDO 1  
 SFO1 400.1474709 MHz  
 NUC1 1H  
 P0 2.67 usec  
 P1 8.00 usec  
 PLW1 20.9850061 W

F2 - Processing parameters  
 SI 65536  
 SF 400.1450000 MHz  
 WDW EM  
 SSB 0  
 LB 0.30 Hz  
 GB 0  
 PC 1.00

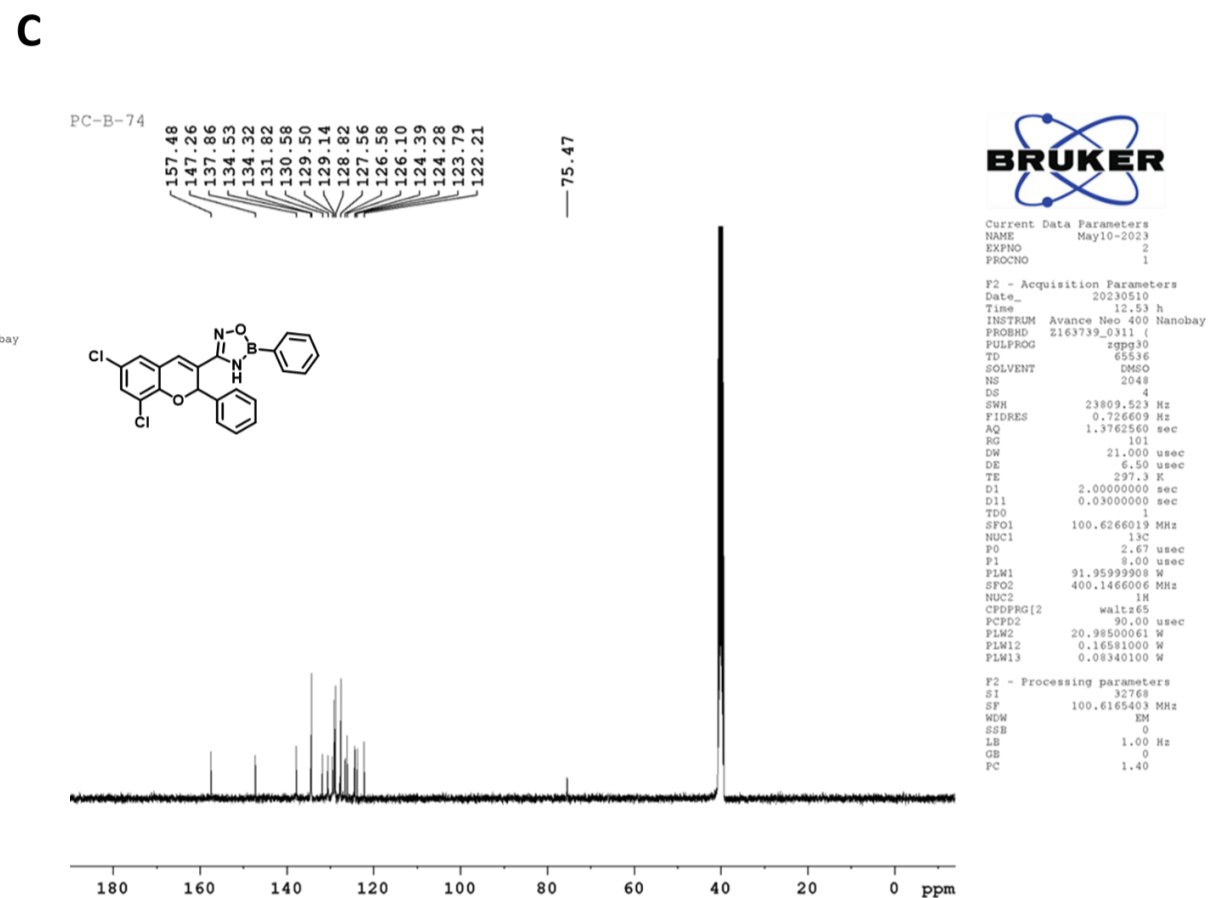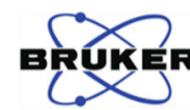

Current Data Parameters  
 NAME May10-2023  
 EXPNO 2  
 PROCNO 1

F2 - Acquisition Parameters  
 Date\_ 20230510  
 Time 12.53 h  
 INSTRUM Avance Neo 400 Nanobay  
 PROCNO 216379\_0311  
 FULPROG zgpg30  
 TD 65536  
 SOLVENT DMSO  
 NS 2048  
 DS 4  
 SWH 23809.523 Hz  
 FIDRES 0.726609 Hz  
 AQ 1.9762660 sec  
 RG 101  
 DW 21.000 usec  
 DE 6.50 usec  
 TE 297.3 K  
 D1 2.0000000 sec  
 D11 0.0300000 sec  
 TDO 1  
 SFO1 100.6266019 MHz  
 NUC1 13C  
 P0 2.67 usec  
 P1 8.00 usec  
 PLW1 91.9599908 W  
 SFO2 400.1466006 MHz  
 NUC2 1H  
 CPDPRG2 waltz165  
 PCPD2 90.00 usec  
 PLM2 20.9850061 W  
 PLM12 0.16581000 W  
 PLM13 0.08340100 W

F2 - Processing parameters  
 SI 32768  
 SF 100.6165403 MHz  
 WDW EM  
 SSB 0  
 LB 1.00 Hz  
 GB 0  
 PC 1.40

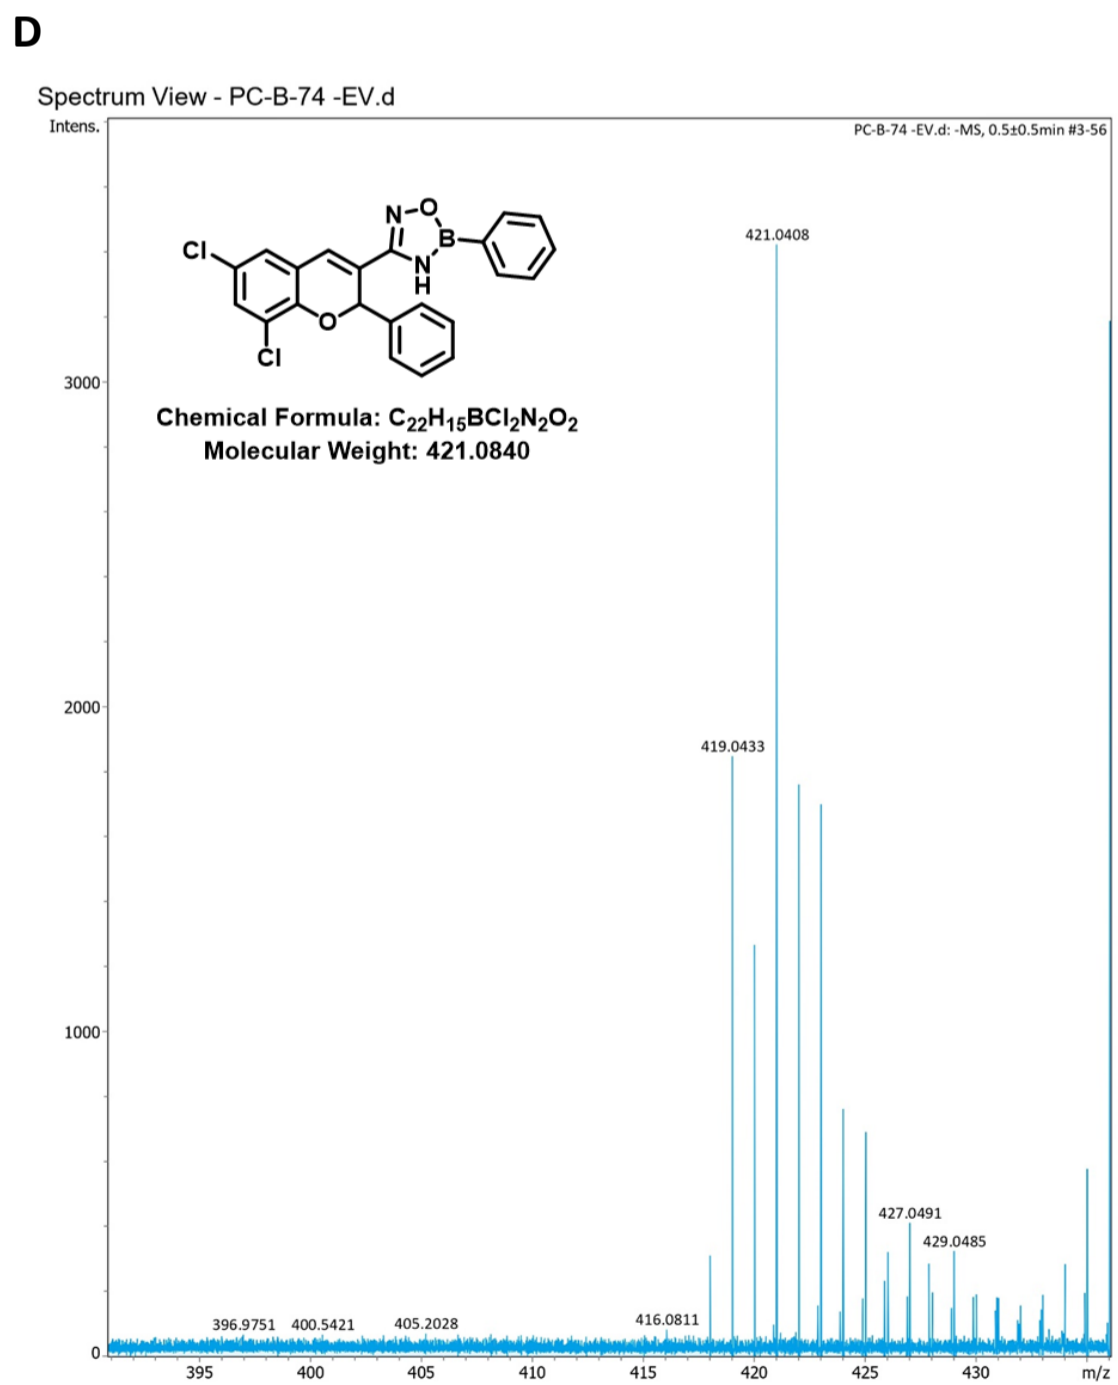

**Figure S5. Synthesis procedure of 3-(6,8-dichloro-2-phenyl-2H-chromen-3-yl)-5-phenyl-4,5-dihydro-1,2,4,5-oxadiazaborole (BT-424).**

**(A) Step-by-step experimental procedure for BT-424 synthesis.**

**Procedure for the synthesis of 6,8-dichloro-2-phenyl-2H-chromene-3-carbonitrile B):** A clean oven dried 20 mL round bottom flask was charged with 6,8-dichloro-2-phenyl-2H-chromene-3-carbaldehyde (**1**) (0.3 mmol), sodium azide (**2**) (0.4 mmol), and triflic acid (0.9 mmol), in acetonitrile (2 mL). The reaction mixture was stirred at room temperature for 16 h. Reaction progress was monitored by TLC. After completion of the reaction, the reaction mass was allowed to cool at ambient temperature, then acetonitrile was evaporated under reduced pressure, diluted with water, and extracted with EtOAc. The combined organic layer was dried with anhydrous Na<sub>2</sub>SO<sub>4</sub> and evaporated under reduced pressure. The crude material was purified by column chromatography. The compound was obtained as a brown solid (1 g, yield 67 %).

<sup>1</sup>H NMR (400 MHz, DMSO-*d*<sub>6</sub>) δ 7.79 (s, 1H), 7.65 (s, 1H), 7.46 (s, 5H), 6.43 (s, 1H)

**Procedure for the synthesis of (Z)-6,8-dichloro-N'-hydroxy-2-phenyl-2H-chromene-3-carboximidamide C):** A clean oven dried 20 mL round bottom flask was charged with **1** (0.6 mmol), hydroxylammonium chloride (**2**) (1.3 mmol), and DIPEA (1.3 mmol), in ethanol (2 mL). The resulting reaction mixture was refluxed for 12 h. Reaction progress was monitored by TLC. After completion of the reaction, the ethanol was evaporated and extracted with EtOAc. The crude material was purified by column chromatography. The compound was obtained as a pale yellow solid (600 mg, yield 54.5 %).

<sup>1</sup>H NMR (400 MHz, DMSO-*d*<sub>6</sub>) δ 10.13 (s, 1H), 7.38 (t, *J* = 2.0 Hz, 1H), 7.31 (d, *J* = 4.1 Hz, 5H), 7.21 (t, *J* = 2.0 Hz, 1H), 6.44 (s, 1H), 5.81 (s, 2H); <sup>13</sup>C NMR (101 MHz, DMSO-*d*<sub>6</sub>) δ 149.27, 147.05, 138.59, 129.76, 129.15, 128.99, 128.82, 127.59, 125.74, 125.70, 125.55, 121.93, 120.19, 75.01.

**Procedure for the synthesis of 3-(6,8-dichloro-2-phenyl-2H-chromen-3-yl)-5-phenyl-4,5-dihydro-1,2,4,5-oxadiazaborole (BT-424):**

A clean oven dried 10 mL round bottom flask was charged with **C** (0.5 mmol), phenylboronic acid (**4**) (0.6 mmol), and dissolved in toluene (3 mL). The reaction mixture was refluxed for 16 h in the presence of MS (4A). Reaction progress was monitored by TLC. After completion of the reaction, toluene was evaporated and the reaction mixture was diluted with acetone. After extracting with acetone and filtration, the filtrate was concentrated under reduced pressure. The residue was crystallized by an ethyl acetate-petroleum ether (1:4) mixture to obtain a pure product. The compound was obtained as a pale brown solid (70 mg, yield 56 %).

<sup>1</sup>H NMR (400 MHz, DMSO-*d*<sub>6</sub>) δ 10.59 (s, 1H), 7.87 (s, 2H), 7.70 (s, 1H), 7.53 (s, 3H), 7.37 (d, *J* = 25.5 Hz, 5H), 6.60 (s, 1H); <sup>13</sup>C NMR (101 MHz, DMSO-*d*<sub>6</sub>) δ 157.50, 147.28, 137.88, 134.55, 134.34, 131.84, 130.60, 129.52, 129.16, 128.83, 127.58, 126.60, 126.11, 124.41, 124.30, 123.81, 122.23, 75.48; MS: calcd. for C<sub>22</sub>H<sub>15</sub>BCl<sub>2</sub>N<sub>2</sub>O<sub>2</sub> H<sup>+</sup> 421.0840, found 421.0408.

**(B) Proton nuclear magnetic resonance (NMR) spectrum, (C) carbon NMR spectrum, and (D) high resolution mass spectrometry (HRMS) spectrum for BT-424.**



**Supplementary Table S1. Serum chemistry test for mice treated with HCK selected inhibitor BT424 and vehicle.**

|                             | PBS-1  | PBS-2  | PBS-3  | PBS-4  | BT424-1 | BT424-2 | BT424-3 | BT424-4 |
|-----------------------------|--------|--------|--------|--------|---------|---------|---------|---------|
| ALP(U/L)                    | 74     | 65     | 106    | 97     | 72      | 61      | 73      | --      |
| AST(U/L)                    | 47     | --     | 63     | 41     | 33      | 30      | 28      | 48      |
| ALT(U/L)                    | 15     | 22     | 28     | 27     | 23      | 16      | 14      | 15      |
| Creatine kinase(U/L)        | 32     | --     | 108    | 67     | 39      | 23      | 26      | --      |
| GGT(U/L)                    | 0      | --     | 0      | 0      | 0       | 0       | 0       | 0       |
| Albumin(g/dL)               | 3.1    | 2.5    | 2.4    | 3.1    | 2.9     | 2.7     | 2.9     | --      |
| Total Bilirubin(mg/dL)      | 0.2    | --     | 0.1    | 0.2    | 0.1     | 0.1     | 0.1     | --      |
| Total Protein(g/dL)         | --     | --     | 4.3    | 5.3    | 5.1     | 4.8     | 4.8     | --      |
| Globulin(g/dL)              | --     | --     | 1.9    | 2.2    | 2.2     | 2.1     | 1.9     | --      |
| Bilirubin-Conjugated(mg/dL) | 0      | --     | 0      | 0      | 0       | 0       | 0       | --      |
| BUN (mg/dL)                 | 32     | --     | 29     | 31     | 24      | 27      | 22      | 28      |
| Creatinine(mg/dL)           | 0      | --     | 0      | 0      | 0       | 0       | 0       | --      |
| Cholesterol(mg/dL)          | 95     | --     | 53     | 81     | 78      | 78      | 67      | --      |
| Glucose(mg/dL)              | 109    | --     | 192    | 230    | 223     | 160     | 236     | --      |
| Calcium(mg/dL)              | 9.3    | --     | 7.5    | 9.2    | 9.1     | 8.4     | 8.5     | --      |
| Phosphorus(mg/dL)           | 7.3    | --     | 7.2    | 8.7    | 7.3     | 5.9     | 8.3     | --      |
| Bicarbonate TCO2(mmol/L)    | 13     | --     | 16     | 15     | 17      | 12      | 12      | --      |
| ALB/GLOB ratio              | --     | --     | 1.3    | 1.4    | 1.3     | 1.3     | 1.5     | --      |
| BUN/Creatinine Ratio        | 0      | --     | 0.1    | 0.2    | 0.1     | 0       | 0       | --      |
| Bilirubin -                 |        |        |        |        |         |         |         |         |
| Unconjugated(mg/dL)         | 0.2    | --     | 0.1    | 0.2    | 0.1     | 0.1     | 0.1     | --      |
| Magnesium(mg/dL)            | 3.2    | --     | 2.8    | 2.9    | 3.4     | 2.5     | 2.9     | --      |
| Triglycerides (mg/dL)       | 76     | --     | 81     | 81     | 110     | 107     | 82      | --      |
| Hemolysis Index             | Normal | Normal | Normal | Normal | Normal  | Normal  | Normal  | Normal  |
| Lipemia Index               | Normal | Normal | Normal | Normal | Normal  | Normal  | Normal  | Normal  |

#### HEMOLYSIS

Normal, + Exhibits no significant effect on chemistry values.

++ Exhibits no significant effect on chemistry values.

+++ May increase AST by 25-50% and decrease ALP and Direct Bilirubin by 25-50%.

++++ May increase AST and CPK by 25 -50%, decrease ALP by > 50%, decrease Total and Direct Bilirubin by 25-50%, and decrease SDMA by 10-25%.

#### LIPEMIA

Normal, +, ++ Exhibits no significant effect on chemistry values.

+++ May decrease Direct Bilirubin by 25-50%.

++++ May decrease ALT, AST and Direct Bilirubin values by >50%.
